# Supplementary figures and images for: Effect of levothyroxine on the progression of carotid intima-media thickness in subclinical hypothyroidism patients: a meta-analysis
Source: PubMed Central journal article supplement — BMJ Open. 2017 Oct 22;7(10):e016053. doi: 10.1136/bmjopen-2017-016053 (PMC5665330; doi:10.1136/bmjopen-2017-016053), 2017-10-22

Meta-analysis estimates, given named study is omitted

| Lower CI Limit

○ Estimate

| Upper CI Limit

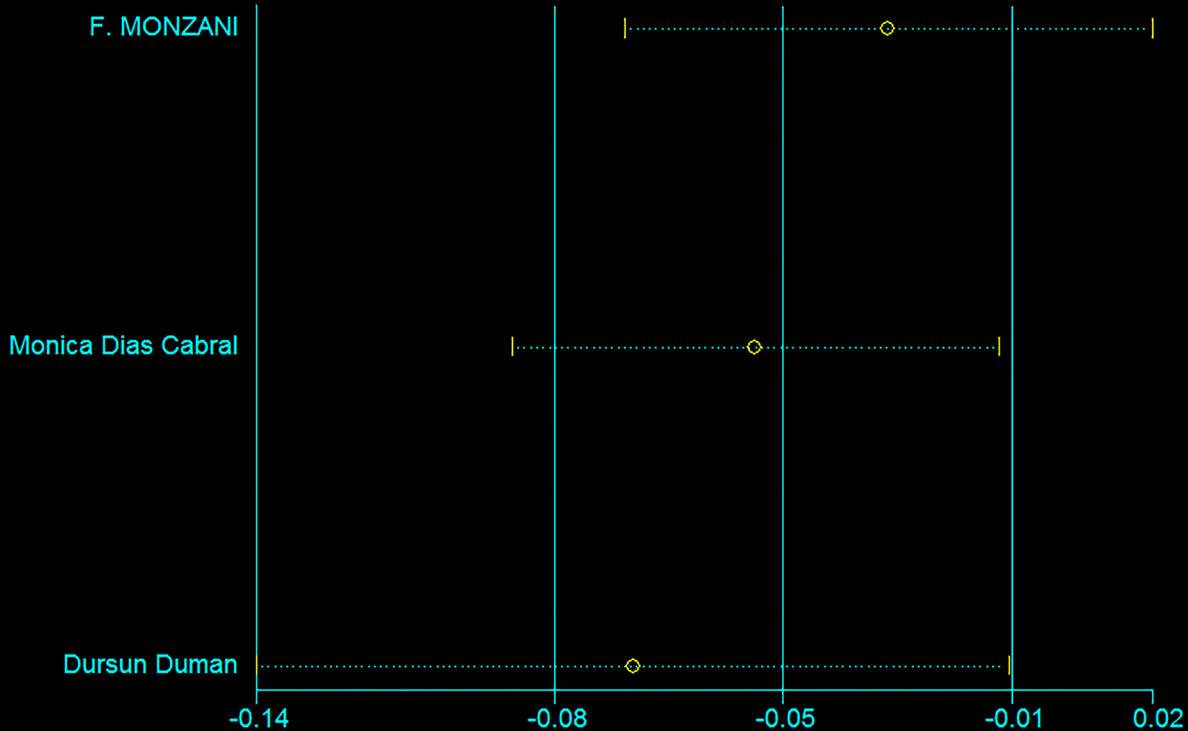

Supplement: bmjopen-2017-016053supp001.pdf [file bmjopen-2017-016053supp001.pdf]

Begg's funnel plot with pseudo 95% confidence limits

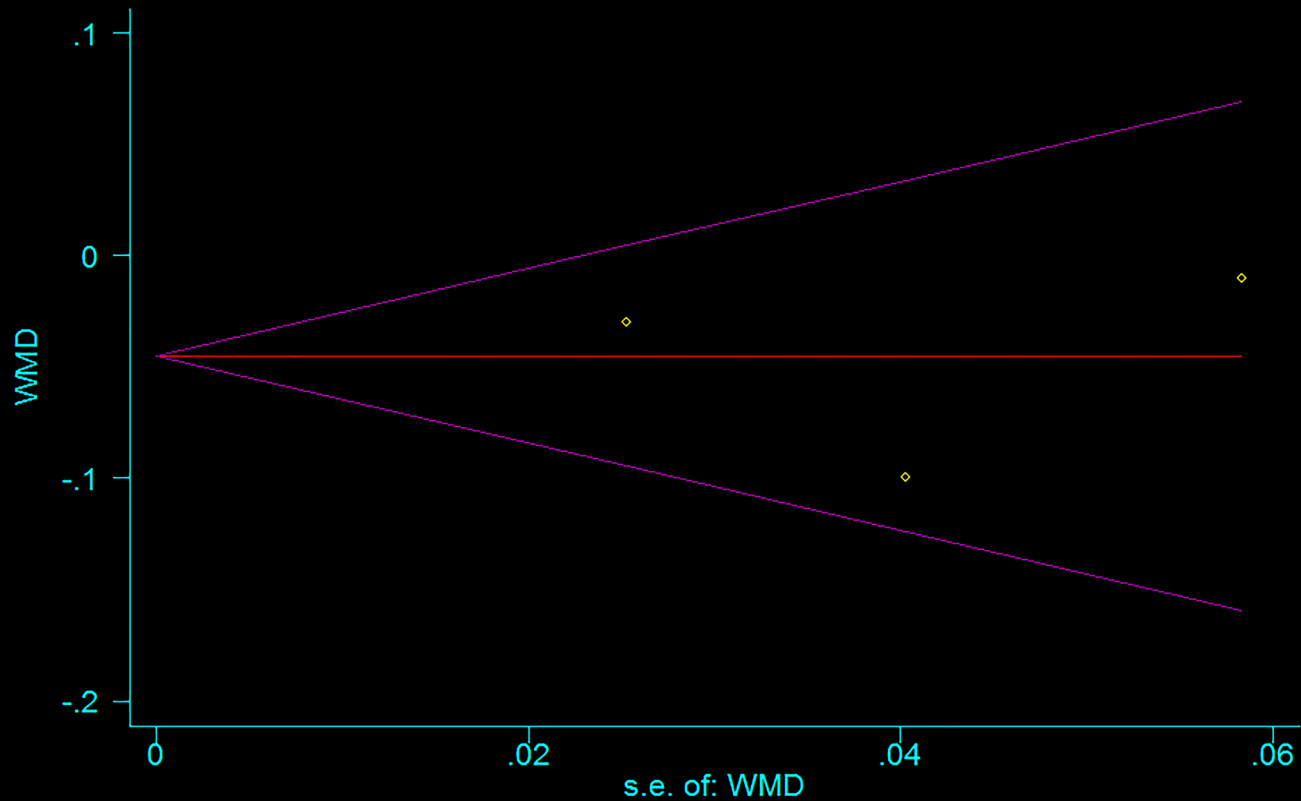

Supplement: bmjopen-2017-016053supp002.pdf [file bmjopen-2017-016053supp002.pdf]

Funnel plot with pseudo 95% confidence limits

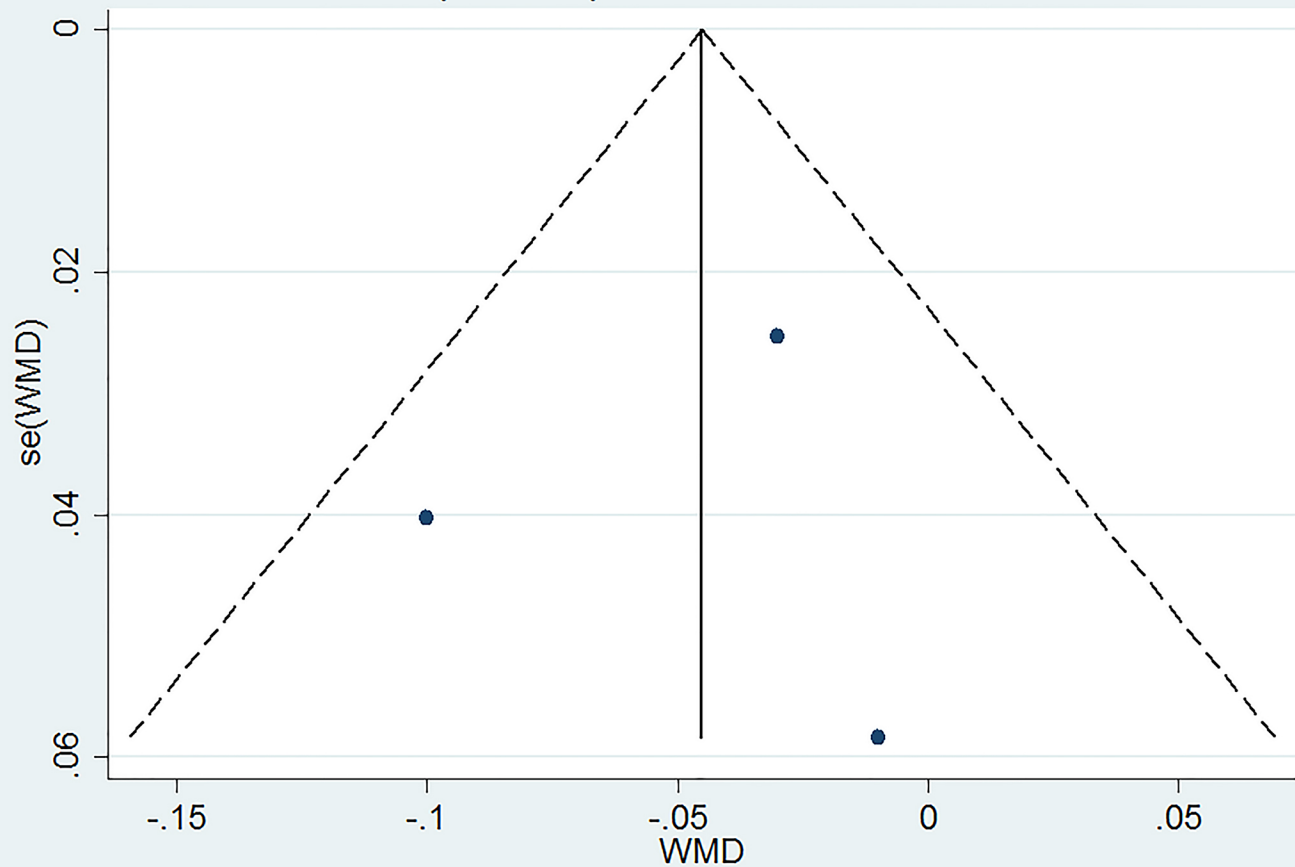

Supplement: bmjopen-2017-016053supp003.pdf [file bmjopen-2017-016053supp003.pdf]

Meta-analysis estimates, given named study is omitted

| Lower CI Limit

○ Estimate

| Upper CI Limit

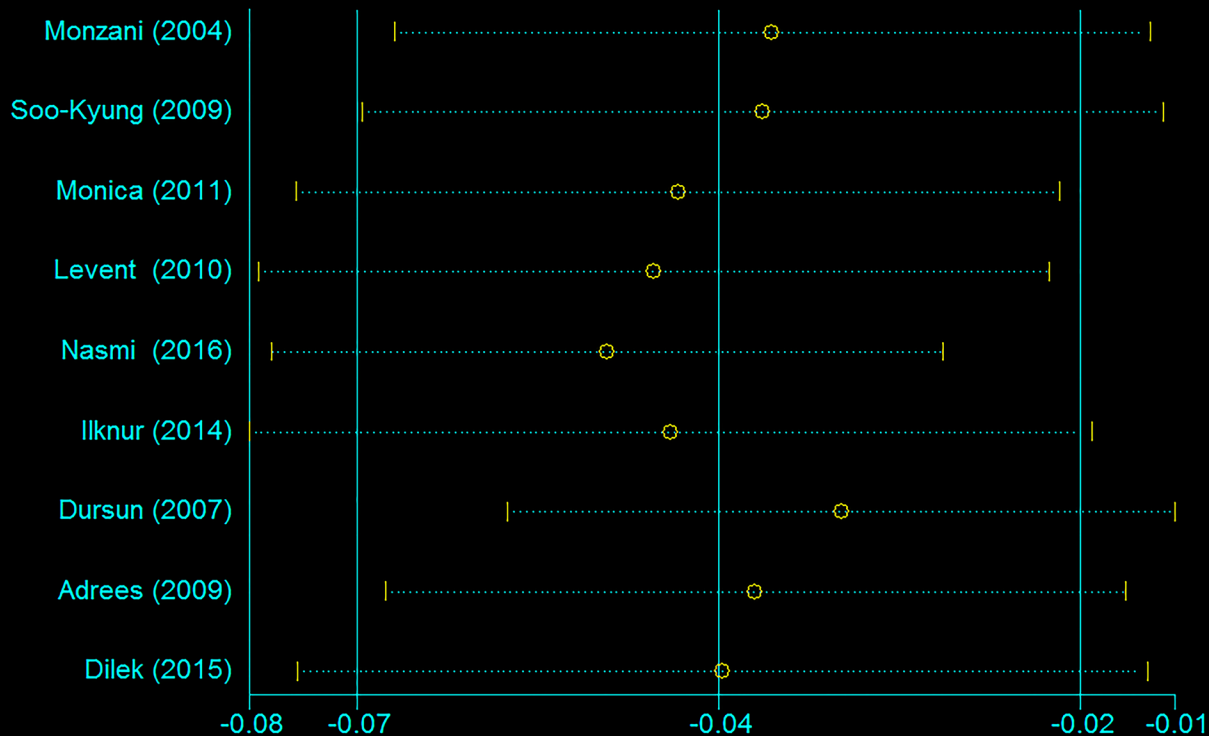

Supplement: bmjopen-2017-016053supp004.pdf [file bmjopen-2017-016053supp004.pdf]

Begg's funnel plot with pseudo 95% confidence limits

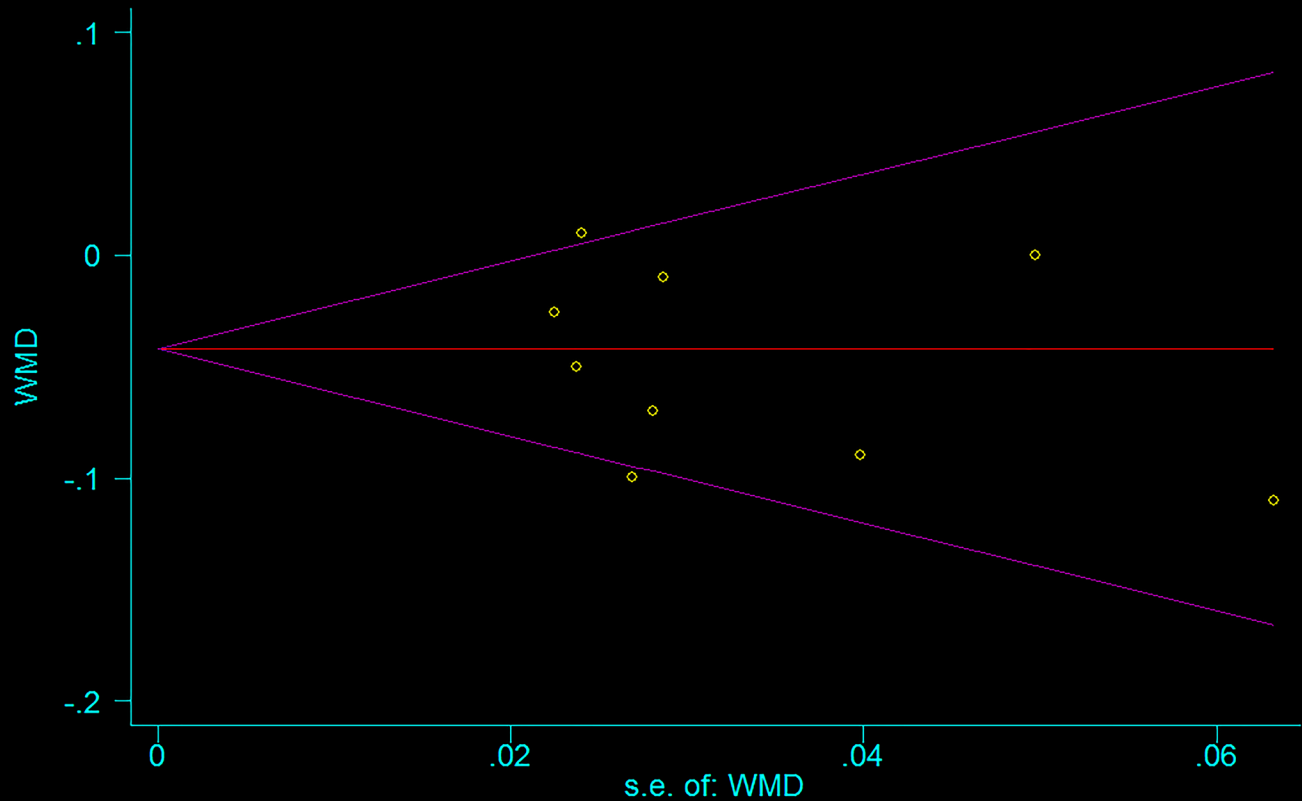

Supplement: bmjopen-2017-016053supp005.pdf [file bmjopen-2017-016053supp005.pdf]

Funnel plot with pseudo 95% confidence limits

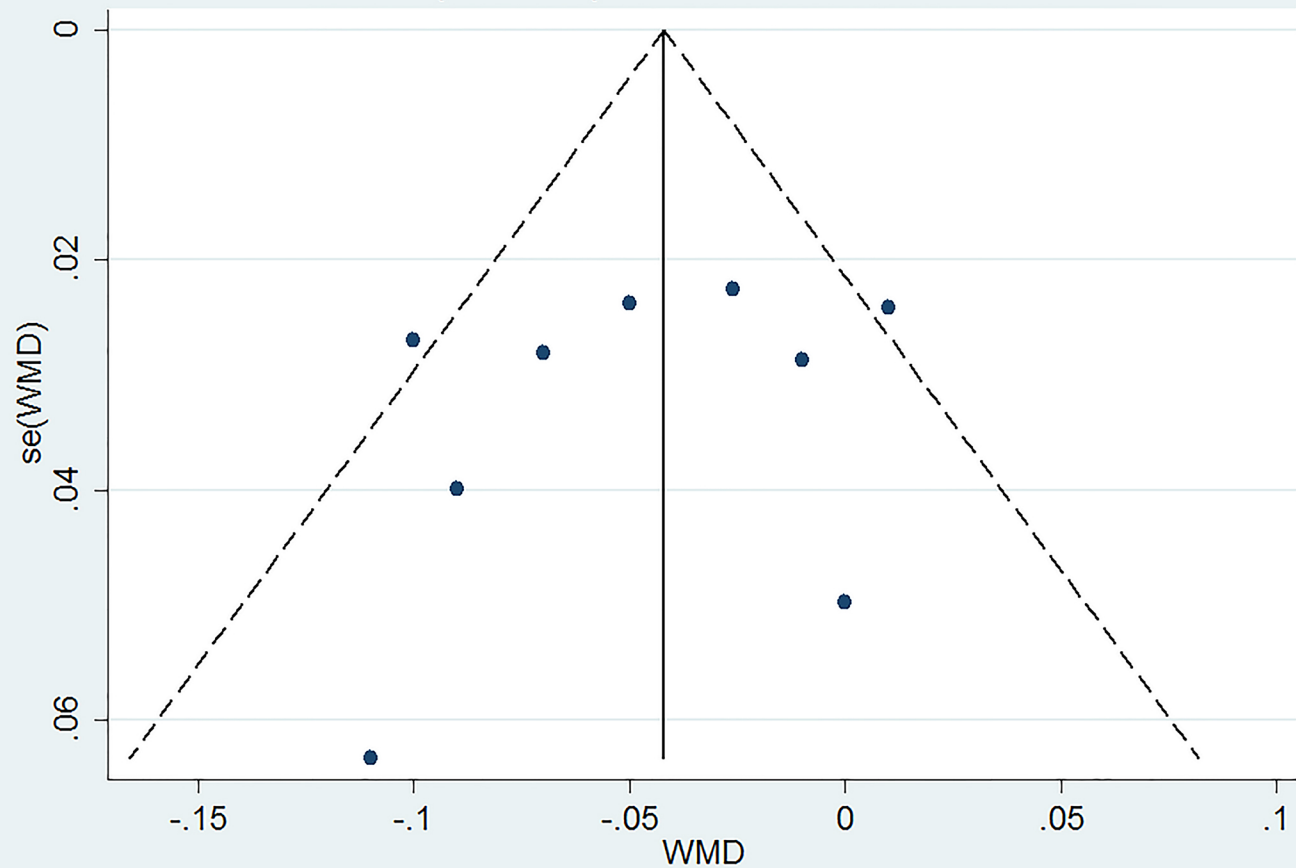

Supplement: bmjopen-2017-016053supp006.pdf [file bmjopen-2017-016053supp006.pdf]
